# Supplementary material for: Total chemical synthesis of the phosphorylated p62 UBA domain reveals that Ser407Pi but not Ser403Pi enhances ubiquitin binding
Source: Royal Society of Chemistry journal article supplement (doi:10.1039/d0ob01906b), 2020-01-01
Supplement: d0ob01906b1.pdf [file d0ob01906b1.pdf]

## Supplementary Information

### Total chemical synthesis of the phosphorylated p62 UBA domain reveals that Ser<sup>407</sup>Pi but not Ser<sup>403</sup>Pi enhances ubiquitin binding

Ling Xu <sup>a,#</sup>, Yan Zhang <sup>a,#</sup>, Yi-Ming Li <sup>b</sup>, Xian-Fu Lu <sup>a,\*</sup>

<sup>a</sup> Department of Anesthesiology (High-Tech Branch), the First Affiliated Hospital of Anhui Medical University, Hefei, Anhui 230027, China

<sup>b</sup> School of Food and Biological Engineering, Hefei University of Technology, Hefei, Anhui 230009, China

‡ These authors contributed equally to this work.

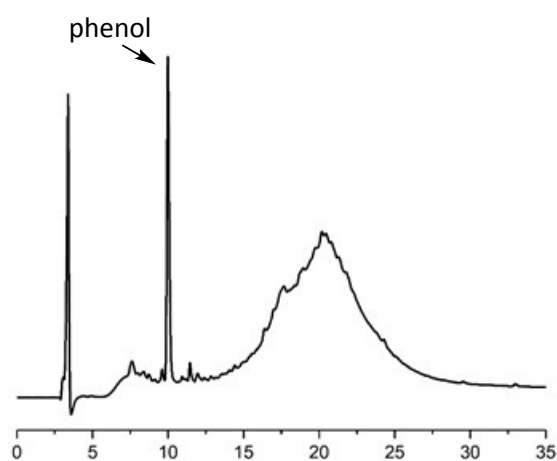

**Figure S1** The crude peptide of UBA-2Pi synthesized in one step by Fmoc-SPPS was characterized by HPLC (214

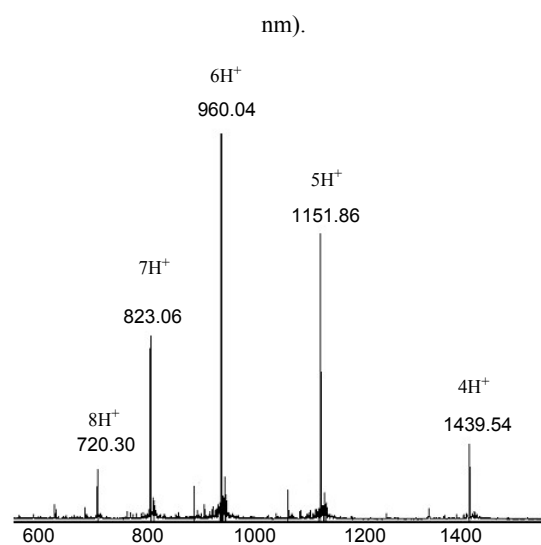

**Figure S2** Analytical ESI-MS characterization of auxiliary intermediate of UBA-2pi **3'**. (Obs: 5754.42 Da, Calc:

5758.15 Da, average isotopes)

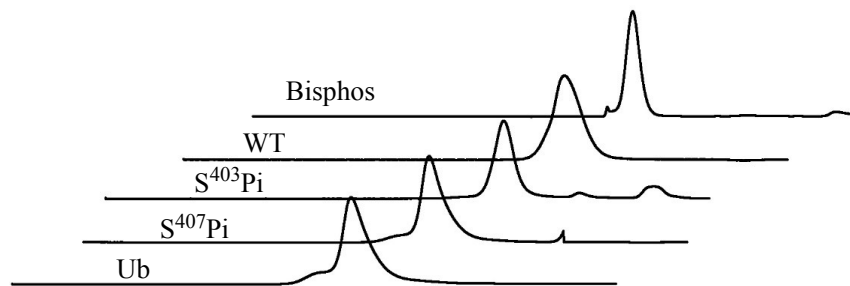

**Figure S3** Size-exclusion chromatography characterization of the refold phosphorylated and wild-type UBA and mono-ubiquitin

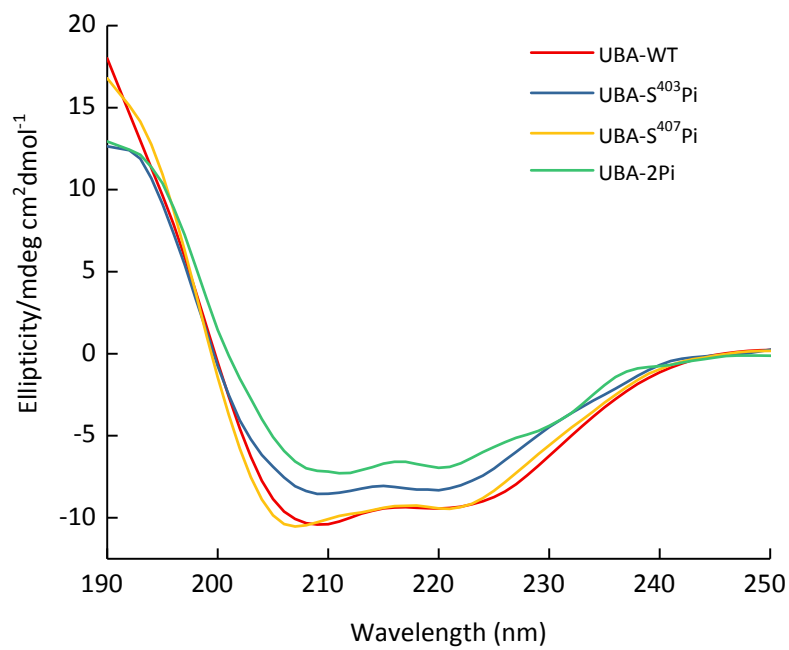

**Figure S4** CD spectra of UBA-WT, UBA-S<sup>403</sup>Pi, UBA-S<sup>407</sup>Pi and UBA-2Pi, which showed characteristic absorptions at 208 nm and 226 nm.
